# Supplementary material
Source: publisher figshare collection journal article supplement (https://sage.figshare.com/ndownloader/files/36578565)

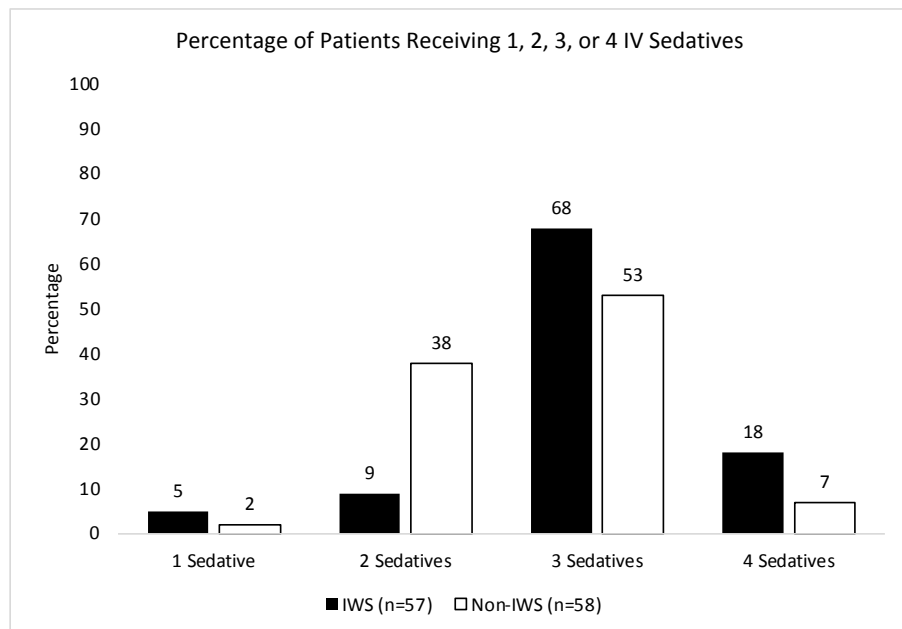

(1a)

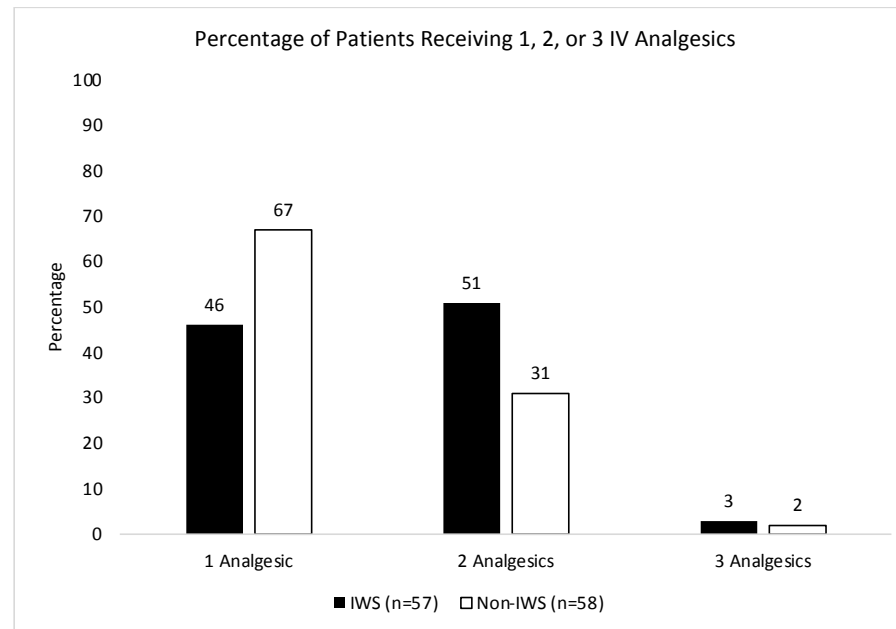

(1b)

**Supplemental Figures 1a-1b.** Total number of different IV sedative (1a) and IV analgesic (1b) medications received while in the ICU in the IWS vs non-IWS groups. Note, this does not include information on degree of overlap between different sedatives and/or analgesics. IV benzodiazepines, dexmedetomidine, propofol, and ketamine were classified as sedatives. Analgesics used were fentanyl, morphine, and hydromorphone.

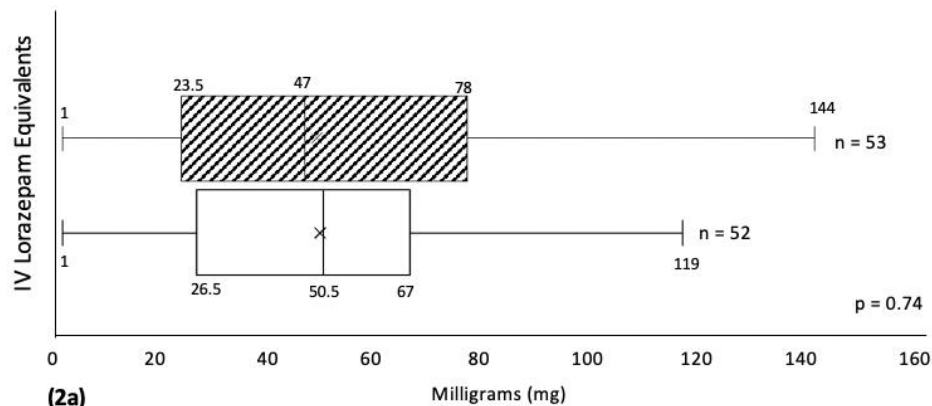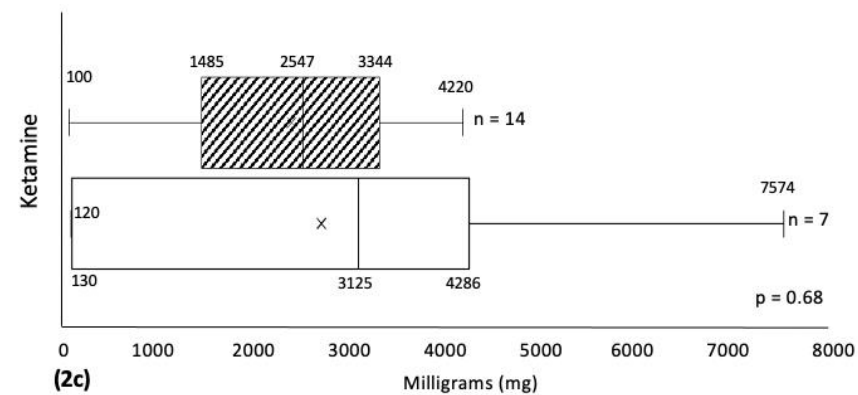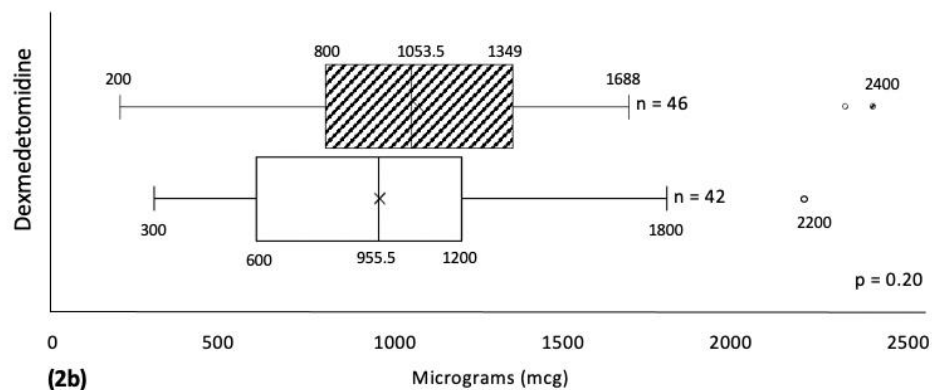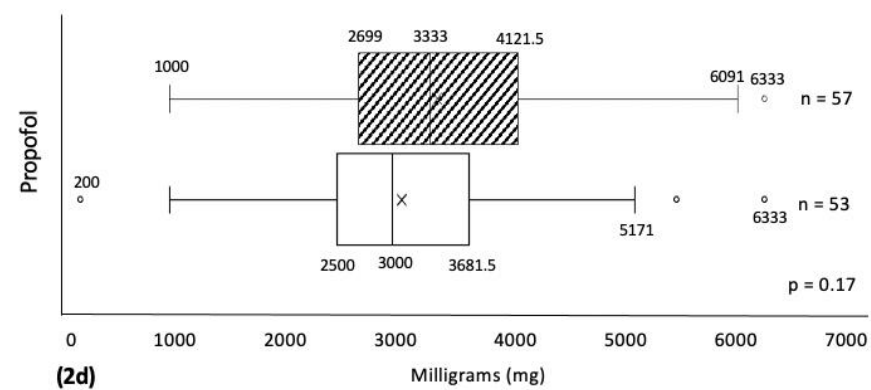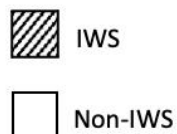

**Supplemental Figures 2a-2e.** Median and quartile ranges of average daily doses of each IV medication, only in patients who received them.

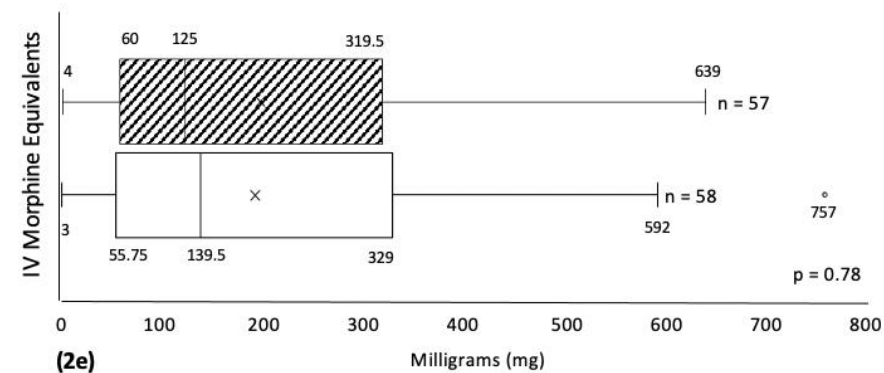

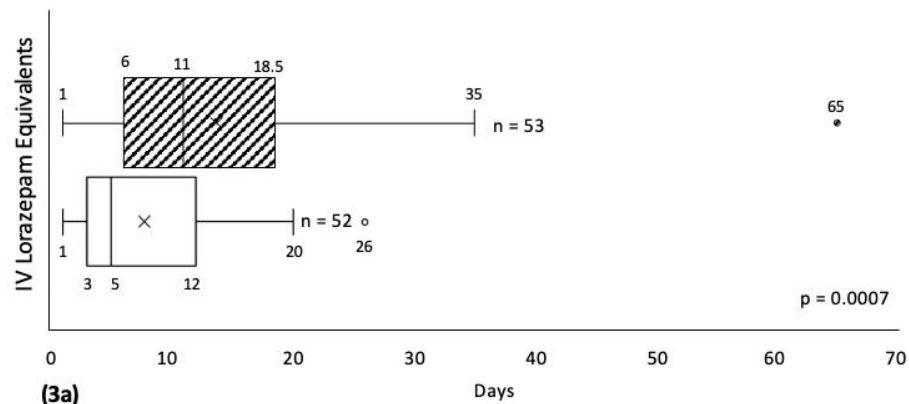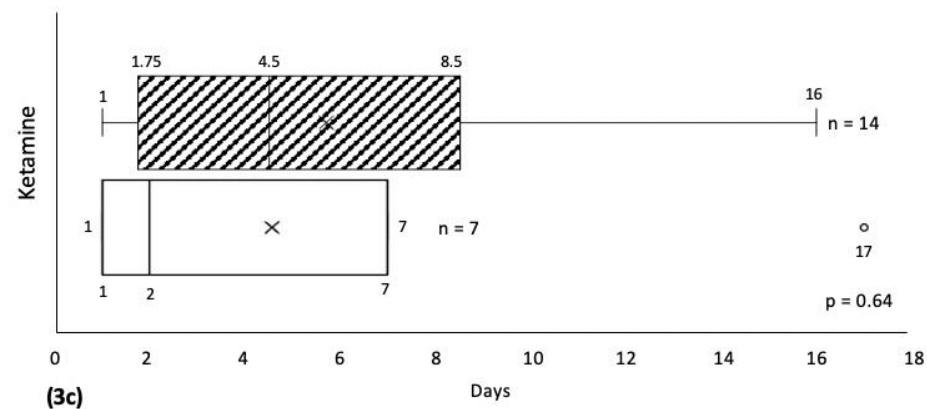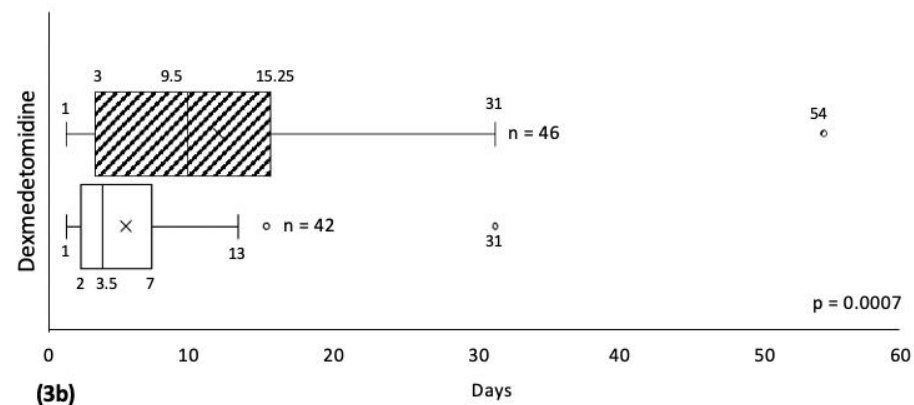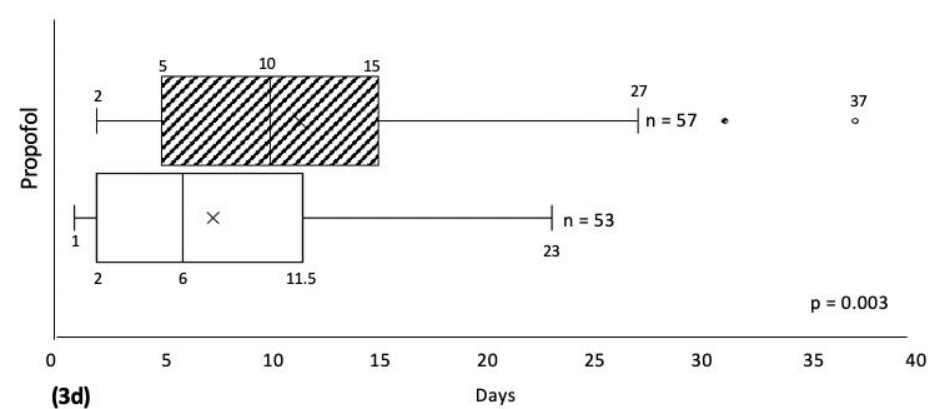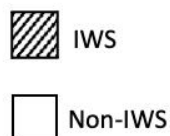

**Supplemental Figures 3a-3e.** Median and quartile ranges of cumulative durations of each IV medication, only in patients who received them.

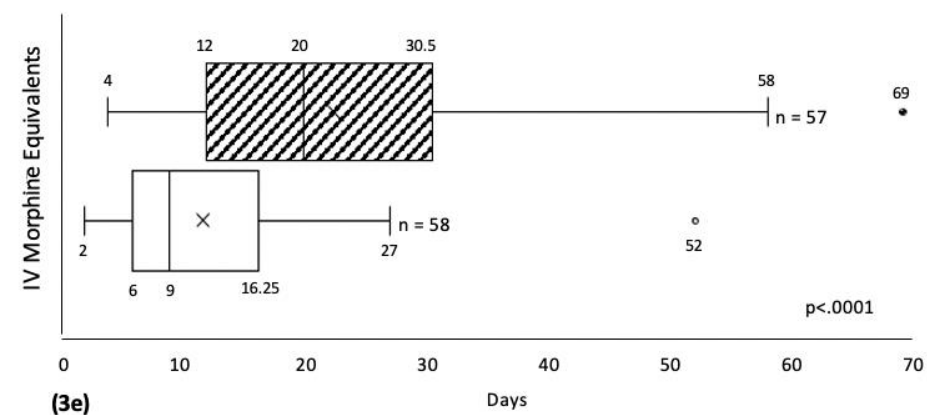

Supplement: Supplementary file 1 [file 36578565]
